# Supplementary material
Source: ML conference proceedings conference paper supplement (https://openreview.net/forum?id=XWbIHOW6u1)
Supplement: supplementary_material [file _NeurIPS2025__MSBM_appendix.pdf › _NeurIPS2025__MSBM_appendix.pdf]

## A Control Theoretic Multi-Marginal Schrödinger Bridge Formulation

In this section, we examine the structure of the solution and the reduction of the Schrödinger Bridge problem in the multi-marginal setting. Since the case of two marginals has been thoroughly studied in prior works [12, 26], we aim to directly extend these results to the multi-marginal scenario.

In standard SBP, the optimality condition can be characterized in terms of Doob's  $h$ -transform [12, 21], with two potential functions  $(\vec{\Phi}, \overleftarrow{\Phi})$  that satisfy the forward and backward time harmonic equations.

**Theorem A.1** (Dynamics SB optimality [45]). *Let  $(\vec{\Phi}, \overleftarrow{\Phi})$  be the solutions to the following PDEs:*

$$\partial_t \vec{\Psi} + \nabla \vec{\Phi}^\top f + \frac{1}{2} \sigma^2 \Delta \vec{\Psi} = 0, \quad \partial_t \overleftarrow{\Phi} + \nabla \cdot (\overleftarrow{\Phi} f) - \frac{1}{2} \sigma^2 \Delta \overleftarrow{\Phi} = 0, \quad (\text{A.1})$$

$$\rho_0(\mathbf{x}) = \vec{\Phi}(0, \mathbf{x}) \overleftarrow{\Phi}(0, \mathbf{x}), \quad \rho_T(\mathbf{x}) = \vec{\Psi}(T, \mathbf{x}) \overleftarrow{\Phi}(T, \mathbf{x}). \quad (\text{A.2})$$

Then, the solution  $\mathbb{P}^{\text{SBP}}$  of SBP is induced by following forward-backward SDEs:

$$d\vec{\mathbf{X}}_t = \left[ f_t + \sigma^2 \nabla_{\mathbf{x}} \vec{\Phi}(t, \vec{\mathbf{X}}_t) \right] dt + \sigma d\mathbf{W}_t, \quad \vec{\mathbf{X}}_0 \sim \rho_0, \quad (\text{A.3a})$$

$$d\overleftarrow{\mathbf{X}}_t = \left[ -f_{T-t} + \sigma^2 \nabla_{\mathbf{x}} \overleftarrow{\Phi}(T-t, \overleftarrow{\mathbf{X}}_t) \right] dt + \sigma d\mathbf{W}_t, \quad \overleftarrow{\mathbf{X}}_0 \sim \rho_T. \quad (\text{A.3b})$$

Note that the forward-backward stochastic process in (A.3a) and (A.3b) satisfying  $\rho_t^{(\text{A.3a})} = \rho_t^{(\text{A.3b})} = \rho_t$  for all  $t \in [0, T]$  and  $\rho_t$  obeys a factorization  $\rho_t(\mathbf{x}) = \vec{\Phi}(t, \mathbf{x}) \overleftarrow{\Phi}(t, \mathbf{x})$ . To solve the SB, one needs to solve the associated PDEs to estimate  $(\vec{\Phi}, \overleftarrow{\Phi})$ . However, due to the high-dimensional nature of the problem, directly solving the PDEs is challenging [19]. Previous works [5, 10, 30] has addressed this issue by formulating an IPF type algorithm [25], where half-bridge optimization is iteratively repeated for the two boundary conditions:

$$\mathbb{P}^{(n+1)} := \arg \min_{\mathbb{P} \in \mathcal{P}_{[0, T], \mathbb{P}_T = \rho_T}} \text{D}_{\text{KL}}(\mathbb{P} | \mathbb{P}^{(n)}), \quad \mathbb{P}^{(n+2)} := \arg \min_{\mathbb{P} \in \mathcal{P}_{[0, T], \mathbb{P}_0 = \rho_0}} \text{D}_{\text{KL}}(\mathbb{P} | \mathbb{P}^{(n+1)}). \quad (\text{A.4})$$

with initialization  $\mathbb{P}^{(0)} := \mathbb{Q}$ . Please refer to [5] for more details.

Now, we extend the SB optimality in A.1 to multi-marginal settings by defining appropriate potentials. Let  $\mathbb{Q} \in \mathcal{P}_{[0, T]}$  be a path measure induced by following Itô SDEs  $d\mathbf{X}_t = \sigma d\mathbf{W}_t$ . We assume that a collection of  $k+1$  marginal distributions  $\rho_{\mathcal{T}} := (\rho_0, \rho_{t_1}, \dots, \rho_{t_k})$  is specified at timestamps  $\mathcal{T} = \{t_0, t_1, \dots, t_k\}$  where  $0 = t_0 < t_1 < \dots < t_k = T$ . We want to explore the most likely evolution between multiple marginals  $\rho_{\mathcal{T}}$  which is the solution of multi-marginal SBP:

$$\min_{\mathbb{P} \in \mathcal{P}(\Omega)} \text{D}_{\text{KL}}(\mathbb{P} | \mathbb{Q}), \quad \text{subject to} \quad \mathbb{P}_t \sim \rho_t, \quad \forall t \in \mathcal{T}. \quad (\text{mSBP})$$

We first consider the static problem of mSBP. Consider the conditioning of the process on  $\mathbf{X}_0 = \mathbf{x}_0, \mathbf{X}_{t_1} = \mathbf{x}_{t_1}, \dots, \mathbf{X}_T = \mathbf{x}_T$  such that

$$\mathbb{P}_{|\mathcal{T}} = \mathbb{P}[\cdot | \mathbf{X}_0 = \mathbf{x}_0, \mathbf{X}_{t_1} = \mathbf{x}_{t_1}, \dots, \mathbf{X}_T = \mathbf{x}_T] \quad (\text{A.5})$$

$$\mathbb{Q}_{|\mathcal{T}} = \mathbb{W}[\cdot | \mathbf{X}_0 = \mathbf{x}_0, \mathbf{X}_{t_1} = \mathbf{x}_{t_1}, \dots, \mathbf{X}_T = \mathbf{x}_T]. \quad (\text{A.6})$$

These conditioned laws can be interpreted as the disintegration of path measure  $\mathbb{P}, \mathbb{Q} \in \mathcal{P}_{[0, T]}$  with respect to multiple time points. Given the multi-marginal joint distributions  $\mathcal{T}, \mathbb{P}_{\mathcal{T}}, \mathbb{Q}_{\mathcal{T}} \in \mathbb{P}_{\mathcal{T}}$  associated with  $\mathbb{P}$  and  $\mathbb{Q}$  at timestamps  $\mathcal{T}$ , respectively, the relative entropy admits the following decomposition:

$$\text{D}_{\text{KL}}(\mathbb{P} | \mathbb{Q}) = \underbrace{\text{D}_{\text{KL}}(\mathbb{P}_{\mathcal{T}} | \mathbb{Q}_{\mathcal{T}})}_{\text{static}} + \underbrace{\int_{\mathbb{R}^{d \times |\mathcal{T}|}} \text{D}_{\text{KL}}(\mathbb{P}_{|\mathcal{T}} | \mathbb{Q}_{|\mathcal{T}}) d\mathbb{P}_{\mathcal{T}}}_{\text{dynamic}}. \quad (\text{A.7})$$

Since  $\mathbb{P}_{\mathcal{T}}$  and  $\mathbb{P}_{|\mathcal{T}}$  can be chosen arbitrarily, we may set  $\mathbb{P}_{|\mathcal{T}} = \mathbb{Q}_{|\mathcal{T}}$  so that the dynamic component of the decomposition in (A.7) vanishes. Under this choice, mSBP reduces to the static problem:

$$\min_{\mathbb{P}_{\mathcal{T}} \in \Pi_{\mathcal{T}}} \text{D}_{\text{KL}}(\mathbb{P}_{\mathcal{T}} | \mathbb{Q}_{\mathcal{T}}), \quad (\text{smSBP})$$

$$\text{where } \Pi_{\mathcal{T}} = \left\{ \mathbb{P}_{\mathcal{T}} \in \mathbb{R}^{d \times |\mathcal{T}|} \mid \int_{\mathbb{R}^{d \times (|\mathcal{T}|-1)}} \mathbb{P}_{\mathcal{T}}(\mathbf{x}_{\mathcal{T}(-i)}) d\mathbf{x}_{\mathcal{T}(-i)} = \rho_{t_i}, \forall i \in [0 : k] \right\}, \quad (\text{A.8})$$

where  $\mathcal{T}^{(-i)} = \{0, \dots, t_{i-1}, t_{i+1}, \dots, T\}$  denotes the set of indices excluding  $t_i$ . In other words, this formulation seeks a multi-marginal coupling  $\mathbb{P}_{\mathcal{T}}$  that matches the prescribed marginal  $\rho_{\mathcal{T}}$ , while minimizing its relative entropy with respect to the reference joint law  $\mathbb{Q}_{\mathcal{T}}$ . Therefore, once the optimal coupling  $\Pi_{\mathcal{T}}^* = \mathbb{P}_{\mathcal{T}}^*$  solving **smSBP** is obtained, it directly induces the solution to **mSBP** via

$$\mathbb{P}^*(\cdot) = \int_{\mathbb{R}^{d \times |\mathcal{T}|}} \mathbb{Q}_{|\mathcal{T}|}(\cdot) d\mathbb{P}_{\mathcal{T}}^*, \quad (\text{A.9})$$

meaning that  $\mathbb{P}^*$  constructed in this way satisfies the original **mSBP**.

Now, we want to derive the multi-marginal Schrödinger potential for **mSBP**. To do so, let us consider the Lagrangian formulation  $\mathcal{L}$  of **mSBP** which is given by:

$$\mathcal{L}(\mathbb{P}_{\mathcal{T}}, \lambda_{\mathcal{T}}) = \text{D}_{\text{KL}}(\mathbb{P}_{\mathcal{T}} | \mathbb{Q}_{\mathcal{T}}) + \sum_{i=0}^{|\mathcal{T}|} \int_{\mathbb{R}^d} \lambda_{t_i}(\mathbf{x}_{t_i}) \left[ \int_{\mathbb{R}^{d \times (\mathcal{T}-1)}} \mathbb{P}_{\mathcal{T}}(\mathbf{x}_{\mathcal{T}}) d\mathbf{x}_{\mathcal{T}^{(-i)}} - \rho_{t_i}(\mathbf{x}_{t_i}) \right] d\mathbf{x}_{t_i}, \quad (\text{A.10})$$

where  $\lambda_{\mathcal{T}} = (\lambda_0, \lambda_{t_1}, \dots, \lambda_T)$  is the Lagrange multipliers where each  $\lambda_{t_i}$  enforcing the marginal constraints at  $t_i \in \mathcal{T}$ . By setting the first variation of  $\mathcal{L}(\mathbb{P}_{\mathcal{T}}, \lambda_{\mathcal{T}})$  to zero, we obtain the optimality condition for the minimizer  $\mathbb{P}_{\mathcal{T}}^*$ . Let  $\delta\mathbb{P}_{\mathcal{T}}(\mathbf{x}_{\mathcal{T}})$  be a perturbation around  $\mathbb{P}_{\mathcal{T}}$ . Consider the measure

$$\mathbb{P}_{\mathcal{T}}^{\epsilon} = \mathbb{P}_{\mathcal{T}} + \epsilon \delta\mathbb{P}_{\mathcal{T}}, \quad (\text{A.11})$$

and by plugging  $\mathbb{P}_{\mathcal{T}}^{\epsilon}$  in (A.11) into Lagrangian (A.10) and compute the first variation of each term. Then, for the first term of RHS in (A.10) we get:

$$\left. \frac{d}{d\epsilon} \right|_{\epsilon=0} \text{D}_{\text{KL}}(\mathbb{P}_{\mathcal{T}}^{\epsilon} | \mathbb{Q}_{\mathcal{T}}) = \left. \frac{d}{d\epsilon} \right|_{\epsilon=0} \int \log \frac{d(\mathbb{P}_{\mathcal{T}} + \epsilon \delta\mathbb{P}_{\mathcal{T}})}{d\mathbb{Q}_{\mathcal{T}}} d(\mathbb{P}_{\mathcal{T}} + \epsilon \delta\mathbb{P}_{\mathcal{T}}) \quad (\text{A.12})$$

$$= \int d\delta\mathbb{P}_{\mathcal{T}} \left( \log \frac{d\mathbb{P}_{\mathcal{T}}}{d\mathbb{Q}_{\mathcal{T}}} + 1 \right). \quad (\text{A.13})$$

Moreover, for the second term of RHS in (A.10) we get:

$$\left. \frac{d}{d\epsilon} \right|_{\epsilon=0} \sum_{i=0}^{|\mathcal{T}|} \int_{\mathbb{R}^d} \lambda_{t_i}(\mathbf{x}_{t_i}) \left[ \int_{\mathbb{R}^{d \times (\mathcal{T}-1)} (\mathbb{P}_{\mathcal{T}} + \epsilon \delta\mathbb{P}_{\mathcal{T}})(\mathbf{x}_{\mathcal{T}}) d\mathbf{x}_{\mathcal{T}^{(-i)}} - \rho_{t_i}(\mathbf{x}_{t_i}) \right] d\mathbf{x}_{t_i} \quad (\text{A.14})$$

$$= \sum_{i=0}^{|\mathcal{T}|} \int_{\mathbb{R}^d} \lambda_{t_i}(\mathbf{x}_{t_i}) \left[ \int_{\mathbb{R}^{d \times (\mathcal{T}-1)} \delta\mathbb{P}_{\mathcal{T}}(\mathbf{x}_{\mathcal{T}}) d\mathbf{x}_{\mathcal{T}^{(-i)}} \right] d\mathbf{x}_{t_i} \quad (\text{A.15})$$

$$= \int_{\mathbb{R}^{d \times |\mathcal{T}|}} \left[ \sum_{i=0}^{|\mathcal{T}|} \lambda_{t_i}(\mathbf{x}_{t_i}) \right] d\delta\mathbb{P}_{\mathcal{T}}(\mathbf{x}_{\mathcal{T}}). \quad (\text{A.16})$$

Hence, we get the total first variation of  $\mathcal{L}(\mathbb{P}_{\mathcal{T}}^{\epsilon}, \lambda_{\mathcal{T}})$  as:

$$\delta\mathcal{L} = \int d\delta\mathbb{P}_{\mathcal{T}} \left( \log \frac{d\mathbb{P}_{\mathcal{T}}}{d\mathbb{Q}_{\mathcal{T}}} + 1 + \left[ \sum_{i=0}^{|\mathcal{T}|} \lambda_{t_i}(\mathbf{x}_{t_i}) \right] \right). \quad (\text{A.17})$$

For the optimality,  $\delta\mathcal{L}$  to be vanished for all admissible  $\delta\mathbb{P}_{\mathcal{T}}$ , hence we get:

$$\log \frac{d\mathbb{P}_{\mathcal{T}}}{d\mathbb{Q}_{\mathcal{T}}} + 1 + \left[ \sum_{i=0}^{|\mathcal{T}|} \lambda_{t_i}(\mathbf{x}_{t_i}) \right] = 0. \quad (\text{A.18})$$

Therefore, we obtain the optimality condition:

$$\mathbb{P}_{\mathcal{T}}^*(\mathbf{x}_{\mathcal{T}}) = \mathbb{Q}_{\mathcal{T}}(\mathbf{x}_{\mathcal{T}}) \exp \left( -1 - \left[ \sum_{i=0}^{|\mathcal{T}|} \lambda_{t_i}(\mathbf{x}_{t_i}) \right] \right) \quad (\text{A.19})$$

$$\stackrel{(i)}{=} \prod_{i=1}^{|\mathcal{T}|} \mathbb{Q}_{|t_{i-1}, t_i}(\mathbf{x}_{t_{i-1}}, \mathbf{x}_{t_i}) \exp \left( \log \rho_0(\mathbf{x}_0) - 1 - \left[ \sum_{i=0}^{|\mathcal{T}|} \lambda_{t_i}(\mathbf{x}_{t_i}) \right] \right) \quad (\text{A.20})$$

$$\stackrel{(ii)}{=} \Psi_0(\mathbf{x}_0) \prod_{i=1}^{|\mathcal{T}|} [\mathbb{Q}_{|t_{i-1}, t_i}(\mathbf{x}_{t_{i-1}}, \mathbf{x}_{t_i}) \Psi_{t_i}(\mathbf{x}_{t_i})] \quad (\text{A.21})$$

where (i) follows from  $\mathbb{Q}_{\mathcal{T}}(\mathbf{x}_{\mathcal{T}}) = \rho_0(\mathbf{x}_0) \prod_{i=1}^k \mathbb{Q}_{|t_{i-1}, t_i}(\mathbf{x}_{t_{i-1}}, \mathbf{x}_{t_i})$  and (ii) follows from defining

$$\exp \left( \log \rho_0(\mathbf{x}_0) - 1 - \left[ \sum_{i=0}^{|\mathcal{T}|} \lambda_{t_i}(\mathbf{x}_{t_i}) \right] \right) = \prod_{i=0}^{|\mathcal{T}|} \Psi_{t_i}(\mathbf{x}_{t_i}), \quad (\text{A.22a})$$

$$\text{where } \Psi_0 = \exp(\log \rho_0(\mathbf{x}_0) - 1 - \lambda_0), \text{ and } \Psi_{t_i} = \exp(-\lambda_{t_i}), \forall i > 0. \quad (\text{A.22b})$$

Observe that since  $\mathbb{P}_{\mathcal{T}}^* = \Pi_{\mathcal{T}}^*$  is the optimal coupling, it follows from equation (A.9) that the path measure factorizes as  $d\mathbb{P}^* = d\mathbb{P}_{\mathcal{T}}^* \cdot \mathbb{Q}_{|\mathcal{T}}^*$ . Combining this with the result from equation (A.19), we obtain the Radon–Nikodym derivative:

$$\frac{d\mathbb{P}^*}{d\mathbb{Q}} = \frac{d\mathbb{P}_{\mathcal{T}}^*}{d\mathbb{Q}_{\mathcal{T}}} \cdot \frac{d\mathbb{P}_{\mathcal{T}}^*}{d\mathbb{Q}_{|\mathcal{T}}} = \frac{d\mathbb{P}_{\mathcal{T}}^*}{d\mathbb{Q}_{|\mathcal{T}}} = \prod_{i=0}^{|\mathcal{T}|} \Psi_{t_i}(\mathbf{x}_{t_i}). \quad (\text{A.23})$$

Moreover, due to the structure of the construction and by applying results such as those in [2, Theorem 2.10], the resulting measure  $\mathbb{P}^*$  is a Markov process.

Hence, from (A.21), we deduce that the optimal coupling  $\mathbb{P}_{\mathcal{T}}^*$  factorized into a functions of  $\mathbf{x}_{t_i}$ . Moreover, since the conditional measure  $\mathbb{Q}_{|t_{i-1}, t_i}$  is reciprocal process, it satisfies time symmetry [34] i.e.,  $\overrightarrow{\mathbb{Q}}_{|t_{i-1}, t_i} = \overleftarrow{\mathbb{Q}}_{|t_i, t_{i-1}}$ . Consequently, for any increasing time sequence  $\vec{\mathcal{T}} = \{t_0, \dots, t_k\}$  and its reversed counterpart  $\overleftarrow{\mathcal{T}} = \{t_k, \dots, t_0\}$ , for a given  $\mathbf{x}_{\mathcal{T}} \in \mathbb{R}^{d \times |\mathcal{T}|}$ , it holds

$$\overrightarrow{\mathbb{Q}}_{|\vec{\mathcal{T}}} = \prod_{i=1}^k \overrightarrow{\mathbb{Q}}_{|t_{i-1}, t_i} = \prod_{i=k}^1 \overleftarrow{\mathbb{Q}}_{|t_i, t_{i-1}} = \overleftarrow{\mathbb{Q}}_{|\overleftarrow{\mathcal{T}}}. \quad (\text{A.24})$$

We now define the multi-marginal Schrödinger potentials in both the forward and backward directions.

**Theorem A.2** (Multi-Marginal Schrödinger Potentials). *For a finite set of timestamps  $\mathcal{T}$  and with corresponding potentials  $\{\Psi_i\}_{i=0}^{|\mathcal{T}|}$  defined in (A.22), let us define a pair of potentials  $(\overrightarrow{\Psi}, \overleftarrow{\Psi})$ :*

$$\overrightarrow{\Psi}(t, \mathbf{x}) = \mathbb{E}_{\mathbb{Q}} \left[ \prod_{j \geq \tau(t)}^{|\mathcal{T}|} \Psi_j(\mathbf{X}_{t_j}) | \mathbf{X}_t = \mathbf{x} \right], \quad \overleftarrow{\Psi}(t, \mathbf{x}) = \mathbb{E}_{\mathbb{Q}} \left[ \prod_{j < \tau(t)}^0 \Psi_j(\mathbf{X}_{t_j}) | \mathbf{X}_t = \mathbf{x} \right], \quad (\text{A.25})$$

where  $\tau(t) = \min_u \{u \geq t | t \in \mathcal{T}\}$ . Then, for any  $t \in [t_{j-1}, t_j]$ ,  $(\overrightarrow{\Psi}, \overleftarrow{\Psi})$  satisfy following PDEs:

$$\partial_t \overrightarrow{\Psi} + \frac{1}{2} \sigma^2 \Delta \overrightarrow{\Psi} = 0, \quad \partial_t \overleftarrow{\Psi} - \frac{1}{2} \sigma^2 \Delta \overleftarrow{\Psi} = 0, \quad (\text{A.26})$$

$$\rho_{t_j}(\mathbf{x}) = \overrightarrow{\Psi}(t_j, \mathbf{x}) \overleftarrow{\Psi}(t_j, \mathbf{x}) = \lim_{t \uparrow t_j} \overrightarrow{\Psi}(t, \mathbf{x}) \overleftarrow{\Psi}(t, \mathbf{x}), \quad (\text{A.27})$$

$$\rho_{t_{j-1}}(\mathbf{x}) = \overrightarrow{\Psi}(t_{j-1}, \mathbf{x}) \overleftarrow{\Psi}(t_{j-1}, \mathbf{x}) = \lim_{t \downarrow t_{j-1}} \overrightarrow{\Psi}(t, \mathbf{x}) \overleftarrow{\Psi}(t, \mathbf{x}). \quad (\text{A.28})$$

Moreover, the solution  $\mathbb{P}^{mSBP}$  of *mSBP* is induced by following forward-backward SDEs:

$$d\vec{\mathbf{X}}_t = \sigma^2 \nabla_{\mathbf{x}} \overrightarrow{\Psi}(t, \vec{\mathbf{X}}_t) dt + \sigma d\mathbf{W}_t, \quad \vec{\mathbf{X}}_0 \sim \rho_0, \quad (\text{A.29a})$$

$$d\overleftarrow{\mathbf{X}}_t = \sigma^2 \nabla_{\mathbf{x}} \overleftarrow{\Psi}(t, \overleftarrow{\mathbf{X}}_t) dt + \sigma d\mathbf{W}_t, \quad \overleftarrow{\mathbf{X}}_0 \sim \rho_T. \quad (\text{A.29b})$$

*Proof.* We begin by proving the boundary conditions in (A.27–A.28). Without loss of generality, we consider the case where  $t \in [t_{j-1}, t_j]$ . By invoking the factorization in (A.23), we obtain:

$$\rho(t, \mathbf{x}) = \mathbb{E}_{\mathbb{P}^*} [\delta(\mathbf{X}_t = \mathbf{x})] = \int_{\Omega} \delta(\mathbf{X}_t = \mathbf{x}) d\mathbb{P}^* \quad (\text{A.30})$$

$$= \int_{\Omega} \delta(\mathbf{X}_t = \mathbf{x}) e^{-1 - \sum_{i=0}^{|\mathcal{T}|} \lambda_{t_i}(\mathbf{x}_{t_i})} d\mathbb{Q} \quad (\text{A.31})$$

$$= \int_{\mathbb{R}^{d \times |\mathcal{T}|}} e^{-1 - \sum_{i=0}^{|\mathcal{T}|} \lambda_{t_i}(\mathbf{x}_{t_i})} d\mathbb{Q}_{t, \mathcal{T}} \quad (\text{A.32})$$

To evaluate the marginal at time  $t$ , we consider an integral over the path space  $\Omega$ , slicing the trajectory into segments for  $t$ . Due to the Markovian  $\mathbb{Q}$ , as consequence of [34, Proposition 1.4] and time symmetry of bridge kernel (A.23), we can express the joint distribution  $\mathbb{Q}_{t,\mathcal{T}}(\mathbf{x}_t, \mathbf{x}_{\mathcal{T}})$ :

$$\mathbb{Q}_{t,\mathcal{T}} = \rho_0(\mathbf{x}_0) \prod_{i=1}^{j-1} \overrightarrow{\mathbb{Q}}_{|t_{i-1}, t_i} \prod_{i=j}^{|\mathcal{T}|} \overleftarrow{\mathbb{Q}}_{|t_{i-1}, t_i} \left[ \overrightarrow{\mathbb{Q}}_{|t_{j-1}, t} \overleftarrow{\mathbb{Q}}_{|t, t_j} \right]. \quad (\text{A.33})$$

Hence, substituting  $\mathbb{Q}_{t,\mathcal{T}}$  in (A.33) into (A.32), we get<sup>2</sup>:

$$\rho(t, \mathbf{x}) = \int_{\mathbb{R}^{d \times |\mathcal{T}|}} e^{\log \rho_0(\mathbf{x}_0) - 1 - \sum_{i=0}^{|\mathcal{T}|} \lambda_{t_i}(\mathbf{x}_{t_i})} \prod_{i=1}^{j-1} \mathbb{Q}_{|t_{i-1}, t_i} \prod_{i=j}^{|\mathcal{T}|} \mathbb{Q}_{|t_{i-1}, t_i} [\mathbb{Q}_{|t_{j-1}, t} \mathbb{Q}_{|t, t_j}] d\mathbf{x}_{\mathcal{T}} \quad (\text{A.34})$$

$$= \int_{\mathbb{R}^{d \times |\mathcal{T}|}} \prod_{i=0}^{|\mathcal{T}|} \Psi_{t_i}(\mathbf{x}_{t_i}) \prod_{i=1}^{j-1} \mathbb{Q}_{|t_{i-1}, t_i} \prod_{i=j}^{|\mathcal{T}|} \mathbb{Q}_{|t_{i-1}, t_i} [\mathbb{Q}_{|t_{j-1}, t} \mathbb{Q}_{|t, t_j}] d\mathbf{x}_{\mathcal{T}} \quad (\text{A.35})$$

$$= \overrightarrow{\Psi}(t, \mathbf{x}) \overleftarrow{\Psi}(t, \mathbf{x}). \quad (\text{A.36})$$

Moreover, limiting procedures in (A.27-A.28) follows directly from the definition of (A.25): as time approaches the boundary  $t_i$ , the potential component  $\Psi_i$ , previously contained within the conditional expectation  $\overrightarrow{\Psi}$  (or  $\overleftarrow{\Psi}$ ), transitions smoothly into the complementary potential  $\overleftarrow{\Psi}$  (or  $\overrightarrow{\Psi}$ ) associated with the opposite time direction. This ensures the resulting density  $\rho_t(\cdot) \in C^{1,2}([0, T], \mathbb{R}^d)$ .

Now, as a consequence of [38, Theorem 4.19] for a unique minimizer of **mSBP** (if it exists), we get

$$D_{\text{KL}}(\mathbb{P}^* | \mathbb{Q}) = \frac{1}{2} \mathbb{E}_{\mathbb{P}^*} \left[ \int_0^T \left\| \sigma \nabla \log \overrightarrow{\Psi}(t, \overrightarrow{\mathbf{X}}_t) \right\|^2 dt \right]. \quad (\text{A.37})$$

In other words, by applying the Girsanov theorem [43, Theorem 8.6.5], it implies that the forward SDEs in (A.29a) induce the solution  $\mathbb{P}^*$  to **mSBP**. Consequently, the associated marginal density  $\rho$  satisfies the Fokker-Planck equation:

$$\partial_t \rho - \nabla \cdot \left( \rho (\sigma^2 \nabla \overrightarrow{\Psi}) \right) - \frac{1}{2} \sigma^2 \Delta \rho = 0, \quad \rho_t(\mathbf{x}) = \overrightarrow{\Psi}_t(\mathbf{x}) \overleftarrow{\Psi}_t(\mathbf{x}), \quad \forall t \in \mathcal{T}. \quad (\text{A.38})$$

Furthermore, by applying the Feynman-Kac formula [1, Theorem 10.5], we obtain the PDE satisfied by  $\overrightarrow{\Psi}$  as characterized in [44, Appendix B.4]:

$$\partial_t \overrightarrow{\Psi} + \frac{1}{2} \sigma^2 \Delta \overrightarrow{\Psi} = 0. \quad (\text{A.39})$$

Combining equations (A.38–A.39) and using the factorization  $\rho_t(\mathbf{x}) = \overrightarrow{\Psi}_t(\mathbf{x}) \overleftarrow{\Psi}_t(\mathbf{x})$ , we deduce, following the derivation [30, Appendix A.4.1], that  $\overleftarrow{\Psi}$  satisfies the backward PDE:

$$\partial_t \overleftarrow{\Psi} - \frac{1}{2} \sigma^2 \Delta \overleftarrow{\Psi} = 0. \quad (\text{A.40})$$

Invoking Nelson's relation [42], we recover the backward dynamics described in (A.29b), which likewise induce the optimal path measure  $\mathbb{P}^*$ . This concludes the proof.  $\square$

**Remark A.3.** The IPF-type iteration (A.4) is expected to remain a valuable tool for approximating the multi-marginal potentials presented in Theorem A.2. Nevertheless, the challenge of enforcing boundary conditions for intermediate states, as specified in equations (A.27) and (A.28), might necessitate more advanced optimization strategies comparable to those developed in MSBM.

Finally, combining (A.37–A.40), we obtain the stochastic optimal control formulation of **mSBP**:

$$\min_{\alpha \in \mathbb{A}} \mathcal{J}(\alpha) = \mathbb{E}_{\mathbb{Q}^\alpha} \left[ \int_0^T \frac{1}{2} \|\alpha_t\|^2 dt \right], \quad (\text{A.41})$$

$$\text{subject to } d\mathbf{X}_t^\alpha = \sigma \alpha_t dt + \sigma d\mathbf{W}_t, \quad \mathbf{X}_t^\alpha \sim \rho_t, \forall t \in \mathcal{T}, \quad (\text{A.42})$$

<sup>2</sup>We will omit the arrow above the character, as it can be inferred from the subscript.

where  $\mathbb{A}$  denotes the family of finite-energy controls adapted to the filtration generated by  $\mathbf{W}_t$ , satisfying  $\mathbb{E}_{\mathbb{Q}^\alpha} \left[ \int_0^T \|\alpha_t\|^2 dt \right] < \infty$ . Here,  $\mathbb{Q}^\alpha$  is the path measure induced associated with (A.42).

Since the cost functional (A.41) can also be derived using Girsanov's theorem with reference measure  $\mathbb{Q}$  associated to the uncontrolled SDE  $d\mathbf{X}_t = \sigma d\mathbf{W}_t$ , we conclude that the expression in (A.37) provides the optimal cost, *i.e.*,  $\min \mathcal{J} = \frac{1}{2} \mathbb{E}_{\mathbb{P}^*} \left[ \int_0^T \left\| \sigma \nabla \log \vec{\Psi}(t, \vec{\mathbf{X}}_t) \right\|^2 dt \right]$ . Consequently, we identify the optimal control for the problem (A.41) as the Markovian feedback control  $\alpha^* := \sigma \nabla \log \vec{\Psi}$ . Furthermore, this optimal control ensures that the marginal constraints in (A.42) are satisfied, as implied by (A.38).

## B Proofs and Derivations

### B.1 Proof of Proposition 1

**Proposition 1** (Reciprocal Property). *For any  $\mathbf{x}_{\mathcal{T}} := (\mathbf{x}_0, \mathbf{x}_{t_1}, \dots, \mathbf{x}_T) \in \mathbb{R}^{d \times (k+1)}$  and  $t \in [t_{i-1}, t_i]$ , the marginal distribution of  $\mathbb{Q}_{|\mathcal{T}}(\cdot | \mathbf{x}_{\mathcal{T}})$  at  $t$  satisfies:*

$$\mathbb{Q}_{|\mathcal{T}}(\mathbf{x}_t | \mathbf{x}_{\mathcal{T}}) = \mathbb{Q}_{|t_{i-1}, t_i}(\mathbf{x}_t | \mathbf{x}_{t_{i-1}}, \mathbf{x}_{t_i}). \quad (8)$$

Therefore, for any  $\mathbb{P} \in \mathcal{P}_{[0, T]}$  the reciprocal projection  $\mathcal{R}^{mm}(\mathbb{P}, \mathcal{T})$  admits the following factorization:

$$\mathcal{R}^{mm}(\mathbb{P}, \mathcal{T}) = \mathbb{P}_{\mathcal{T}} \mathbb{Q}_{|\mathcal{T}} = \mathbb{P}_{t_0, \dots, t_k} \mathbb{Q}_{|t_0, \dots, t_k} = \mathbb{P}_{t_0, \dots, t_k} \prod_{i=1}^k \mathbb{Q}_{|t_{i-1}, t_i}, \quad \mathbb{P}\text{-a.e.} \quad (9)$$

*Proof.* Let us consider a Markov measure  $\mathbb{Q}$ . Then following factorization holds for  $\mathbb{Q}$  [2, Definition 2.2] for any events  $A_i \in \sigma(\mathbf{X}_{[t_{i-1}, t_i]})$  for all  $i \in [1 : k]$ :

$$\mathbb{Q}(\cap_{i=1}^k A_i | \mathbf{X}_{\mathcal{T}}) = \mathbb{Q}_{|0, t_1}(A_1 | \mathbf{X}_0, \mathbf{X}_{t_1}) \mathbb{Q}_{|t_1, t_2}(A_2 | \mathbf{X}_{t_1}, \mathbf{X}_{t_2}) \cdots \mathbb{Q}_{|t_{k-1}, T}(A_k | \mathbf{X}_{t_{k-1}}, \mathbf{X}_T). \quad (B.1)$$

Without loss of generality, consider  $t \in [t_{i-1}, t_i]$ . To isolate the conditional distribution of  $\mathbf{X}_t$  given endpoints  $\mathbf{X}_{t_{i-1}}$  and  $\mathbf{X}_{t_i}$ , choose events as follows:

$$A_j = \begin{cases} \Omega, & j \neq i, \\ \{\mathbf{X}_t \in B\}, & B \in \sigma(\mathbf{X}_t), \quad j = i. \end{cases} \quad (B.2)$$

Then, substituting (B.2) into the factorization in (B.1), we obtain:

$$\mathbb{Q}_{|\mathcal{T}}(\mathbf{X}_t \in B | \mathbf{X}_{\mathcal{T}}) = \mathbb{Q}_{|t_{i-1}, t_i}(\mathbf{X}_t \in B | \mathbf{X}_{t_{i-1}}, \mathbf{X}_{t_i}). \quad (B.3)$$

Since  $B \in \sigma(\mathbf{X}_t)$  was chosen arbitrarily, this implies that:

$$\mathbb{Q}_{|\mathcal{T}}(\mathbf{X}_t | \mathbf{X}_{\mathcal{T}}) = \mathbb{Q}_{|t_{i-1}, t_i}(\mathbf{X}_t | \mathbf{X}_{t_{i-1}}, \mathbf{X}_{t_i}), \quad t \in [t_{i-1}, t_i]. \quad (B.4)$$

Now, by disintegration of the path measure, we have

$$\mathbb{Q}(\cdot) = \int_{\mathbb{R}^{d \times |\mathcal{T}|}} \mathbb{Q}_{|\mathcal{T}}(\cdot | \mathbf{x}_{\mathcal{T}}) d\mathbb{Q}_{\mathcal{T}}(\mathbf{x}_{\mathcal{T}}) = \int_{\mathbb{R}^{d \times |\mathcal{T}|}} \prod_{i=1}^k \mathbb{Q}_{|t_{i-1}, t_i}(\cdot | \mathbf{x}_{t_{i-1}}, \mathbf{x}_{t_i}) d\mathbb{Q}_{\mathcal{T}}(\mathbf{x}_{\mathcal{T}}), \quad \mathbb{Q}\text{-a.e.} \quad (B.5)$$

It implies that for any  $\mathbb{P}_{\mathcal{T}} \in \mathcal{P}_{\mathcal{T}}$ , we get  $\mathbb{P}_{\mathcal{T}} \mathbb{Q}_{|\mathcal{T}} = \mathbb{P}_{\mathcal{T}} \prod_{i=1}^k \mathbb{Q}_{|t_{i-1}, t_i}$ .

□

### B.2 Proof of Proposition 2

**Proposition 2** (Multi-Marginal Markovian Projection). *Let  $\Pi \in \mathcal{P}_{[0, T]}$  admit factorization in (9). The multi-marginal Markov projection of  $\Pi$ ,  $\mathbb{P}^* := \mathcal{M}^{mm}(\Pi, \mathcal{T}) \in \mathcal{P}_{[0, T]}$ , is associated with the SDE:*

$$d\mathbf{X}_t^* = [f_t(\mathbf{X}_t^*) + \sigma v^*(t, \mathbf{X}_t^*)] dt + \sigma d\mathbf{W}_t, \quad \mathbf{X}_0^* \sim \Pi_0, \quad (10)$$

$$\text{where } v^*(t, \mathbf{x}) = \sum_{i=1}^k \mathbf{1}_{[t_{i-1}, t_i]} \mathbb{E}_{\Pi_{t_i|t}} [\nabla \log \mathbb{Q}_{t_i|t}(\mathbf{X}_{t_i} | \mathbf{X}_t) | \mathbf{X}_t = \mathbf{x}]. \quad (11)$$

Moreover,  $v^*$  satisfies the Fokker-Planck equation (FPE) [50]:

$$\partial_t \rho_t = -\nabla \cdot (v_t^*(\mathbf{x}) \rho_t(\mathbf{x})) + \frac{\sigma^2}{2} \Delta \rho_t(\mathbf{x}) = 0, \quad \rho_t = \Pi_t, \quad \forall t \in \mathcal{T}, \quad (12)$$

where  $p_t$  is marginal density of  $\Pi_t$ . In other words,  $\mathbb{P}_t^* = \Pi_t$  for all  $t \in [0, T]$ .  $d$

*Proof.* Let  $\mathcal{T}_i = \{t_{i-1}, t_i\}$  denote the set of two consecutive boundary time points,  $\mathcal{T}_{<i} = \{0, \dots, t_{i-2}\}$  and  $\mathcal{T}_{>i} = \{t_{i+1}, \dots, T\}$  represent the set of all time points preceding and following the interval  $\mathcal{T}_i$ , respectively. Then, for  $t \in [t_{i-1}, t_i]$ , we have:

$$\partial_t \rho_t = \partial_t \int \mathbb{Q}_{|\mathcal{T}}(\mathbf{x}_t) d\Pi_{\mathcal{T}}(\mathbf{x}_{\mathcal{T}}) \quad (\text{B.6})$$

$$= \partial_t \int \frac{\mathbb{Q}_{t, \mathcal{T}}(\mathbf{x}_t, \mathbf{x}_{\mathcal{T}})}{\mathbb{Q}_{\mathcal{T}}(\mathbf{x}_{\mathcal{T}})} d\Pi_{\mathcal{T}}(\mathbf{x}_{\mathcal{T}}) \quad (\text{B.7})$$

$$= \partial_t \int \frac{\mathbb{Q}_{t, \mathcal{T}_{<i}, \mathcal{T}_{>i} | \mathcal{T}_i}(\mathbf{x}_t, \mathbf{x}_{\mathcal{T}_{<i}}, \mathbf{x}_{\mathcal{T}_{>i}} | \mathbf{x}_{\mathcal{T}_i}) \mathbb{Q}_{\mathcal{T}_i}(\mathbf{x}_{\mathcal{T}_i})}{\mathbb{Q}_{\mathcal{T}}(\mathbf{x}_{\mathcal{T}})} d\Pi_{\mathcal{T}}(\mathbf{x}_{\mathcal{T}}) \quad (\text{B.8})$$

$$\stackrel{(i)}{=} \partial_t \int \frac{\mathbb{Q}_{\mathcal{T}_{<i}, \mathcal{T}_{>i} | \mathcal{T}_i}(\mathbf{x}_{\mathcal{T}_{<i}}, \mathbf{x}_{\mathcal{T}_{>i}} | \mathbf{x}_{\mathcal{T}_i}) \mathbb{Q}_{t | \mathcal{T}_i}(\mathbf{x}_t | \mathbf{x}_{\mathcal{T}_i}) \mathbb{Q}_{\mathcal{T}_i}(\mathbf{x}_{\mathcal{T}_i})}{\mathbb{Q}_{\mathcal{T}}(\mathbf{x}_{\mathcal{T}})} d\Pi_{\mathcal{T}}(\mathbf{x}_{\mathcal{T}}) \quad (\text{B.9})$$

$$= \partial_t \int \frac{\mathbb{Q}_{\mathcal{T}}(\mathbf{x}_{\mathcal{T}}) \mathbb{Q}_{t | \mathcal{T}_i}(\mathbf{x}_t | \mathbf{x}_{\mathcal{T}_i})}{\mathbb{Q}_{\mathcal{T}}(\mathbf{x}_{\mathcal{T}})} d\Pi_{\mathcal{T}}(\mathbf{x}_{\mathcal{T}}) \quad (\text{B.10})$$

$$= \partial_t \int \mathbb{Q}_{t | \mathcal{T}_i}(\mathbf{x}_t | \mathbf{x}_{\mathcal{T}_i}) d\Pi_{\mathcal{T}}(\mathbf{x}_{\mathcal{T}}) \quad (\text{B.11})$$

$$= \int \partial_t \mathbb{Q}_{t | \mathcal{T}_i}(\mathbf{x}_t | \mathbf{x}_{\mathcal{T}_i}) d\Pi_{\mathcal{T}}(\mathbf{x}_{\mathcal{T}}) \quad (\text{B.12})$$

$$= \int \left[ -\nabla \cdot (v_{t | \mathcal{T}_i}(\mathbf{x}_t | \mathbf{x}_{\mathcal{T}_i}) \rho_{t | \mathcal{T}_i}(\mathbf{x}_t | \mathbf{x}_{\mathcal{T}_i})) + \frac{1}{2} \sigma^2 \Delta \rho_{t | \mathcal{T}_i}(\mathbf{x}_t | \mathbf{x}_{\mathcal{T}_i}) \right] d\Pi_{\mathcal{T}}(\mathbf{x}_{\mathcal{T}}) \quad (\text{B.13})$$

$$= -\nabla \cdot \int v_{t | \mathcal{T}_i}(\mathbf{x}_t | \mathbf{x}_{\mathcal{T}_i}) \rho_{t | \mathcal{T}_i}(\mathbf{x}_t | \mathbf{x}_{\mathcal{T}_i}) d\Pi_{\mathcal{T}}(\mathbf{x}_{\mathcal{T}}) + \frac{1}{2} \sigma^2 \Delta \int \rho_{t | \mathcal{T}_i}(\mathbf{x}_t | \mathbf{x}_{\mathcal{T}_i}) d\Pi_{\mathcal{T}}(\mathbf{x}_{\mathcal{T}}) \quad (\text{B.14})$$

$$\stackrel{(ii)}{=} -\nabla \cdot (v_t^i(\mathbf{x}_t) \rho_t(\mathbf{x}_t)) + \frac{1}{2} \sigma^2 \Delta p_t(\mathbf{x}_t), \quad (\text{B.15})$$

where (i) follows from the piece-wise reciprocal property of  $\Pi$  for each interval  $[t_{i-1}, t_i]$  in (B.1), and (ii) follows by defining:

$$v_t^i(\mathbf{x}_t) = \frac{\int v_{t | \mathcal{T}_i}(\mathbf{x}_t | \mathbf{x}_{\mathcal{T}_i}) \rho_{t | \mathcal{T}_i}(\mathbf{x}_t | \mathbf{x}_{\mathcal{T}_i}) d\Pi_{\mathcal{T}}(\mathbf{x}_{\mathcal{T}})}{\rho_t(\mathbf{x}_t)} \quad (\text{B.16})$$

$$= \int v_{t | \mathcal{T}_i}(\mathbf{x}_t | \mathbf{x}_{\mathcal{T}_i}) \frac{\rho_{t | \mathcal{T}_i}(\mathbf{x}_t)}{\rho_t(\mathbf{x}_t | \mathbf{x}_{\mathcal{T}_i})} d\Pi_{\mathcal{T}_i}(\mathbf{x}_{\mathcal{T}_i}) \quad (\text{B.17})$$

$$= \int v_{t | \mathcal{T}_i}(\mathbf{x}_t | \mathbf{x}_{\mathcal{T}_i}) d\Pi_{t_i | t}(\mathbf{x}_{t_i} | \mathbf{x}_t) \quad (\text{B.18})$$

$$= \mathbb{E}_{\Pi_{t_i | t}} [\nabla_{\mathbf{x}_t} \log \mathbb{Q}_{t_i | t}(\mathbf{X}_{t_i} | \mathbf{X}_t) | \mathbf{X}_t = \mathbf{x}_t]. \quad (\text{B.19})$$

Hence, for arbitrary  $t \in [0, T] - \mathcal{T}$ , we get the desired expression:

$$v^*(t, \mathbf{x}) = \sum_{i=1}^{|\mathcal{T}|} \mathbb{E}_{\Pi_{t_i | t}} v^i(t, \mathbf{x}) \mathbf{1}_{[t_{i-1}, t_i)}(t) \quad (\text{B.20})$$

$$= \sum_{i=1}^{|\mathcal{T}|} \mathbb{E}_{\Pi_{t_i | t}} [\nabla_{\mathbf{x}_t} \log \mathbb{Q}_{t_i | t}(\mathbf{X}_{t_i} | \mathbf{X}_t) | \mathbf{X}_t = \mathbf{x}_t] \mathbf{1}_{[t_{i-1}, t_i)}(t) \quad (\text{B.21})$$

Moreover, since the measures induced by the SDEs with drifts  $\{v^i\}_{i \in [1:k]}$  for each local interval  $\{[t_{i-1}, t_i]\}$  share their marginal distributions at each boundary time points  $t \in \mathcal{T}$ , the SDEs in (10) form a Markov process. Consequently, we obtain the associated FPE with marginal constraints specified by the prescribed distributions  $\{\rho_t\}_{t \in \mathcal{T}}$ , which can be constructed using  $v^*$ :

$$\partial_t \rho_t = -\nabla \cdot (v_t^*(\mathbf{x}_t) \rho_t(\mathbf{x}_t)) + \frac{1}{2} \Delta \rho_t(\mathbf{x}_t) = 0, \quad \rho_t = \rho_t, \quad \forall t \in \mathcal{T}. \quad (\text{B.22})$$

This completes the proof.  $\square$

### B.3 Proof of Proposition 3

Our results are based on [2, 38], in a manner analogous to the SBM proof for SBP in [55, Appendix C.3], which was based on [26], and serve as a natural extension to the multi-marginal setting.

**Proposition 3** (Uniqueness). *Let  $\mathbb{P}^*$  be a Markov measure which is reciprocal class of  $\mathbb{Q}$  satisfying  $\mathbb{P}_t^* = \rho_t$  for all  $t \in \mathcal{T}$ . Then,  $\mathbb{P}^*$  is unique solution  $\mathbb{P}^{mSBP}$  of the mSBP.*

*Proof.* Below, we proof that; **(A)**: If some measure  $\mathbb{P}^* \in \mathcal{P}_{[0,T]}$  satisfying the Radon-Nikodym derivative in (A.23), then it is a Markov process and reciprocal class of  $\mathbb{Q}$  satisfying marginal constraints  $\{\rho_t\}_{\mathcal{T}}$ ; **(B)**: If the unique solution  $\mathbb{P}^{\text{mSBP}}$  of **mSBP** exists, then it will has Radon-Nikodym derivative in (A.23); **(C)**: If some measure  $\mathbb{P}^* \in \mathcal{P}_{[0,T]}$  satisfying the Radon-Nikodym derivative in (A.23), then it is unique solution  $\mathbb{P}^{\text{mSBP}}$  of **mSBP**.

**(A)** Previously, we established that a solution  $\mathbb{P}^*$  of **mSBP** possesses a Radon-Nikodym derivative with respect to the reference measure  $\mathbb{Q}$  of the product form  $\frac{d\mathbb{P}^*}{d\mathbb{Q}} = \prod_{i=0}^{|\mathcal{T}|} \Psi_{t_i}(\mathbf{x}_{t_i})$  as in (A.23). By combining the results in [2, Theorem 2.10], since  $\prod_{i=0}^{|\mathcal{T}|} \Psi_{t_i}(\mathbf{X}_{t_i})$  is  $\sigma(\mathbf{X}_{\mathcal{T}})$ -measurable, it is a Markov process. Moreover, it satisfies  $\mathbb{P}^* = \int \mathbb{Q}_{|\mathcal{T}} d\mathbb{P}_{\mathcal{T}}^*$  in (A.9), it concluded that  $\mathbb{P}^*$  reciprocal class of  $\mathbb{Q}$  i.e.,  $\mathbb{P}^* = \mathcal{R}^{\text{mm}}(\mathbb{P}^*, \mathcal{T})$ .

**(B)** Our goal is to verify that  $\mathbb{P}^*$  is indeed the *unique* solution the the **mSBP**. By combining the results in [2, Theorem 4.5], (if it exists) the unique solution of  $\mathbb{P}^{\text{mSBP}}$  is a Markov process and admit following Radon-Nikodym derivative with respect to  $\mathbb{Q}$ :

$$\frac{d\mathbb{P}^{\text{mSBP}}}{d\mathbb{Q}} = \exp(\mathbb{A}[0, 1]), \quad (\text{B.23})$$

where  $\mathbb{A}[0, 1]$  is  $\sigma(\mathbf{X}_{\mathcal{T}})$ -measurable function. Again, since the product form  $\prod_{i=0}^{|\mathcal{T}|} \Psi_{t_i}(\mathbf{x}_{t_i})$  is  $\sigma(\mathbf{X}_{\mathcal{T}})$ -measurable, it states that the solution we found is indeed a unique solution  $\mathbb{P}^{\text{mSBP}}$ .

**(C)** Let us consider the set of measures satisfying the multi-marginal constraints:

$$\mathcal{C}_{\mathcal{T}} = \{\mathbb{P} \in \mathcal{P}_{[0,T]} : (\mathbf{X}_t)_{\#} \mathbb{P} = \rho_t, \forall t \in \mathcal{T}\}. \quad (\text{B.24})$$

By leveraging results in [38, Theorem 2.6], under mild condition, the unique minimizer  $\mathbb{P}^* \in \mathcal{C}_{\mathcal{T}}$  of **mSBP** has a Radon-Nikodym derivative that can be written as  $\frac{d\mathbb{P}^*}{d\mathbb{Q}} = \prod_{i=0}^{|\mathcal{T}|} \Psi_{t_i}(\mathbf{x}_{t_i})$  as in (A.23).

Combining the arguments from parts **(A-C)**, we establish the following: the unique minimizer  $\mathbb{P}^* \in \mathcal{C}_{\mathcal{T}}$  for **mSBP** is characterized if and only if it is a Markov process that belongs to the reciprocal class of  $\mathbb{Q}$ . It concludes the proof.  $\square$

#### B.4 Proof of Proposition 4

Our proof builds upon the work of [47, 55]. Standard SBM convergence relies on the Pythagorean property of (reverse) KL-divergence and compactness of the set  $\{\mathbb{P} \in \mathcal{P}_{[0,T]} : D_{\text{KL}}(\mathbb{P}|\mathbb{P}^{\text{mSBP}}) \leq D_{\text{KL}}(\mathbb{P}^{(0)}|\mathbb{P}^{\text{mSBP}})\}$ . Therefore, if our proposed multi-marginal projection operators,  $\mathcal{R}^{\text{mm}}$  and  $\mathcal{M}^{\text{mm}}$ , also satisfy a Pythagorean law analogous to those in [47, 55], then their convergence analysis can be directly applied to our multi-marginal scenario.

**Proposition 4** (Convergence).  $\mathbb{P}^{(n)} = \mathbb{P}^{\text{mSBP}}$  of **mSBP** as  $n \uparrow \infty$  with iterative procedure in (13).

*Proof.* Let  $\Pi := \mathcal{R}^{\text{mm}}(\mathbb{P}, \mathcal{T})$  denote the multi-marginal reciprocal projection of a path measure  $\mathbb{P}$ , and let  $\mathbb{M} := \mathcal{M}^{\text{mm}}(\Pi, \mathcal{T})$  be the subsequent multi-marginal Markovian projection of  $\Pi$ . As established in Proposition 2, the marginal distributions match at each time point, i.e.,  $\Pi_t = \mathbb{M}_t$  for all  $t \in [0, T]$ , and specifically at the initial time,  $\Pi_0 = \mathbb{M}_0 = \rho_0$ . Following the principles outlined by [47, pp. 37-38], we can establish a Pythagorean law for the KL-divergences [15] for these multi-marginal projections  $\mathcal{R}^{\text{mm}}$  and  $\mathcal{M}^{\text{mm}}$ . For any path measure  $\mathbb{P} \in \mathcal{P}_{[0,T]}$ :

$$D_{\text{KL}}(\Pi|\mathbb{P}) = D_{\text{KL}}(\Pi|\mathbb{M}) + D_{\text{KL}}(\mathbb{M}|\mathbb{P}). \quad (\text{B.25})$$

If we choose  $\mathbb{P} = \mathbb{P}^{\text{mSBP}}$ , the unique solution to the **mSBP**, the Pythagorean law implies the inequality:

$$D_{\text{KL}}(\Pi|\mathbb{P}^{\text{mSBP}}) \geq D_{\text{KL}}(\mathbb{M}|\mathbb{P}^{\text{mSBP}}), \quad (\text{B.26})$$

where equality holds if and only if  $\Pi = \mathbb{M}$ . Furthermore, as proven in Proposition 3,  $\mathbb{P}^{\text{mSBP}}$  is a Markov process within the set of measures  $\mathcal{C}_{\mathcal{T}}$  (satisfying the marginal constraints at times  $\mathcal{T}$ ) and belongs to the reciprocal class of the reference measure  $\mathbb{Q}$ . Consequently, the condition  $\Pi = \mathbb{M}$  is met if and only if both  $\Pi$  and  $\mathbb{M}$  are equal to the unique solution  $\mathbb{P}^{\text{mSBP}}$ .



Now, consider an iterative process for  $n \geq 0$ . Let  $\mathbb{P}^{(n-1)}$  be a Markovian. Define the reciprocal projection  $\Pi^{(n)} = \mathcal{R}^{\text{mm}}(\mathbb{P}^{(n-1)}, \mathcal{T})$ . Through the disintegration of the path measure, we have that:

$$D_{\text{KL}}(\Pi^{(n)} | \mathbb{P}^{\text{mSBP}}) = D_{\text{KL}}(\Pi_{\mathcal{T}}^{(n)} | \mathbb{P}_{\mathcal{T}}^{\text{mSBP}}) + \int_{\mathbb{R}^{d \times |\mathcal{T}|}} D_{\text{KL}}(\Pi_{\mathcal{T}}^{(n)} | \mathbb{P}_{\mathcal{T}}^{\text{mSBP}}) d\Pi_{\mathcal{T}}^{(n)} \quad (\text{B.27})$$

$$\stackrel{(i)}{=} D_{\text{KL}}(\Pi_{\mathcal{T}}^{(n)} | \mathbb{P}_{\mathcal{T}}^{\text{mSBP}}), \quad (\text{B.28})$$

where (i) follows because the reciprocal projection  $\mathcal{R}^{\text{mm}}$  ensures that the resulting conditional path measure  $\Pi_{\mathcal{T}}^{(n)}$  is a mixture of bridges between adjacent marginals, identical to that of  $\mathbb{P}_{\mathcal{T}}^{\text{mSBP}}$  (as described in relation to (A.9)), i.e.,  $\Pi_{\mathcal{T}}^{(n)} = \mathbb{P}_{\mathcal{T}}^{\text{mSBP}} = \mathbb{Q}_{|\mathcal{T}}$ . Next, let  $\mathbb{M}^{(n)} = \mathcal{M}^{\text{mm}}(\Pi^{(n)}, \mathcal{T})$  be the Markovian projection of  $\Pi^{(n)}$ . The KL divergences between  $\mathbb{M}^{(n)}$  and  $\mathbb{P}^{\text{mSBP}}$  becomes:

$$D_{\text{KL}}(\mathbb{M}^{(n)} | \mathbb{P}^{\text{mSBP}}) = D_{\text{KL}}(\mathbb{M}_{\mathcal{T}}^{(n)} | \mathbb{P}_{\mathcal{T}}^{\text{mSBP}}) + \int_{\mathbb{R}^{d \times |\mathcal{T}|}} D_{\text{KL}}(\mathbb{M}_{\mathcal{T}}^{(n)} | \mathbb{P}_{\mathcal{T}}^{\text{mSBP}}) d\mathbb{M}_{\mathcal{T}}^{(n)} \quad (\text{B.29})$$

$$\stackrel{(ii)}{\geq} D_{\text{KL}}(\Pi_{\mathcal{T}}^{(n+1)} | \mathbb{P}_{\mathcal{T}}^{\text{mSBP}}), \quad (\text{B.30})$$

where  $\Pi^{(n+1)} = \mathcal{R}^{\text{mm}}(\mathbb{M}^{(n)}, \mathcal{T})$ , and (ii) is stated to follow from the IMF iteration as per (A.4). This implies the desired intermediate result for the convergence argument:

$$D_{\text{KL}}(\mathbb{M}^{(n)} | \mathbb{P}^{\text{mSBP}}) \geq D_{\text{KL}}(\Pi^{(n+1)} | \mathbb{P}^{\text{mSBP}}). \quad (\text{B.31})$$

Consequently, under the assumption that the relevant KL divergences (such as  $D_{\text{KL}}(\Pi | \mathbb{M})$ ) are finite, the convergence proof presented by [55, Appendix C.6] can be directly adapted to our multi-marginal case, given our construction of  $\mathcal{M}^{\text{mm}}$  and  $\mathcal{R}^{\text{mm}}$ . This concludes the proof.  $\square$

## B.5 Proof of Corollary 5

**Corollary 5** (Multi-Marginal Schrödinger Bridge). *Assume a sequence of controls  $\{v^i, u^i\}_{i \in [1:k]}$ , where each  $v^i, u^i$  induced local SBs  $\mathbb{P}^i$  of SBP over local interval  $[t_{i-1}, t_i]$  with distributions  $(\rho_{t_{i-1}}, \rho_{t_i})$  in a forward and backward direction, respectively. If  $\lim_{t \uparrow t_i} v^i(t, \mathbf{x}) = v^{i+1}(t, \mathbf{x})$  and  $\lim_{t \downarrow t_{i-1}} u^i(t, \mathbf{x}) = u^{i-1}(t, \mathbf{x})$  for all  $i \in [1:k]$ , then  $\mathbb{P}^{\text{mSBP}}$  of mSBP induced by following SDEs:*

$$d\mathbf{X}_t^* = [f_t(\mathbf{X}_t^*) + \sigma v^*(t, \mathbf{X}_t^*)] dt + \sigma d\mathbf{W}_t, \quad \mathbf{X}_0^* \sim \rho_0. \quad (\text{18a})$$

$$d\mathbf{Y}_t^* = [-f_{T-t}(\mathbf{Y}_t^*) + \sigma u^*(t, \mathbf{Y}_t^*)] dt + \sigma d\mathbf{W}_t, \quad \mathbf{Y}_0^* \sim \rho_T, \quad (\text{18b})$$

$$\text{where } v^*(t, \mathbf{x}) = \sum_{i=1}^k \mathbf{1}_{[t_{i-1}, t_i]}(t) v^i(t, \mathbf{x}), \quad u^*(t, \mathbf{x}) = \sum_{i=1}^k \mathbf{1}_{(t_{i-1}, t_i]}(t) u^i(t, \mathbf{x}). \quad (\text{18c})$$

*Proof.* Consider local forward SBs  $\vec{\mathbb{P}}^i$  (governed by control  $v^i$ ) and local backward SBs  $\overleftarrow{\mathbb{P}}^i$  (governed by  $u^i$ ) on intervals  $[t_{i-1}, t_i]$ . Global forward path measure  $\vec{\mathbb{P}} = \rho_0 \prod_{i=1}^k \vec{\mathbb{P}}^i_{|t_{i-1}}$  and global backward path measure  $\overleftarrow{\mathbb{P}} = \rho_T \prod_{i=1}^k \overleftarrow{\mathbb{P}}^i_{|t_i}$  are constructed by sequentially composing these local SBs, starting from the initial distribution  $\rho_0$  and terminal distribution  $\rho_T$ , respectively. By this construction,  $\vec{\mathbb{P}}$  and  $\overleftarrow{\mathbb{P}}$  inherently satisfy all specified marginal constraints  $\{\rho_t\}_{t \in \mathcal{T}}$  and belong to the reciprocal class of the reference measure  $\mathbb{Q}$ . The Markov property and absolute continuity constraint  $D_{\text{KL}}(\vec{\mathbb{P}} | \mathbb{Q}) < \infty$  or  $D_{\text{KL}}(\overleftarrow{\mathbb{P}} | \mathbb{Q}) < \infty$  for these global path measures  $\vec{\mathbb{P}}$  and  $\overleftarrow{\mathbb{P}}$  hinges on the continuity of their sample paths  $\mathbf{X}_t^*$ . This path continuity is achieved if the composite global controls  $v^*$  in (18a) and  $u^*$  in (18b) are continuous across the entire time horizon  $[0, T]$ , ensuring seamless transitions at each intermediate time  $t_i$  i.e.,  $\lim_{t \uparrow t_i} v^i(t, \mathbf{x}) = v^{i+1}(t, \mathbf{x})$  and  $\lim_{t \downarrow t_{i-1}} u^i(t, \mathbf{x}) = u^{i-1}(t, \mathbf{x})$  for all  $i \in [1:k]$ . With continuous sample paths,  $\vec{\mathbb{P}}$  and  $\overleftarrow{\mathbb{P}}$  are indeed Markov processes satisfying the absolute continuity condition with respect to  $\mathbb{Q}$ . Given Proposition 3, which states that a Markov process satisfying all marginal constraints and belonging to the reciprocal class of  $\mathbb{Q}$  is the unique solution to mSBP. It concludes the proof.  $\square$

## C Experimental Details

Our evaluation of MSBM involved several datasets and followed established experimental protocols from baseline methods to ensure fair comparisons. For the petal dataset and the 100-dimensional



Table C.1: Training Hyper-parameters

| Dataset     | Learning Rate      | Iteration (N) | Training step (S) | # of Discretization | Batch Size | $T$ |
|-------------|--------------------|---------------|-------------------|---------------------|------------|-----|
| Petal       | $1 \times 10^{-3}$ | 20            | 1000              | 30                  | 256        | 4   |
| hESC        | $1 \times 10^{-3}$ | 100           | 1000              | 30                  | 256        | 5   |
| EB(100-dim) | $2 \times 10^{-4}$ | 10            | 1000              | 100                 | 256        | 4   |
| EB(5-dim)   | $2 \times 10^{-4}$ | 3             | 50000             | 100                 | 256        | 4   |

EB [39], we adopted the experimental setup of DMSB [9]<sup>3</sup>. The processed data for these experiments were inherited from TrajectoryNet [58]<sup>4</sup>. To maintain a fair comparison with DMSB, we parameterized both the forward ( $v$ ) and backward ( $u$ ) controls using the residual-based networks described in [9], ensuring a similar total model parameter count of approximately 1.28M for these two datasets. For the 100-dimensional EB dataset, we further split the entire dataset into training and testing subsets with an 85%/15% ratio, respectively.

Regarding the hESC [14], our experiments mirrored the setup of SBIRR [54]<sup>5</sup> and inherited the processed data therein. We based the parameterization of our model on the network architecture used for the petal and 100-dim EB datasets. For a consistent comparison on the hESC dataset, we maintained a model size of approximately 24k total parameters.

For the 5-dimensional EB dataset, we followed the experimental protocol of NLSB [24]<sup>6</sup>. We inherited processed data from TrajectoryNet [58]. In this case, the forward ( $v$ ) and backward ( $u$ ) controls were also parameterized with the residual-based networks described in [9].

Across all experiments, models were trained using the Adam optimizer [22] with Exponential Moving Average (EMA) applied at a decay rate of 0.999. The proposed MSBM training procedure (detailed in Algorithm 1) involved  $N$  outer iterations, with each outer iteration containing  $S$  inner training steps. Cached marginal distributions were updated in each outer iteration. Impressively, the complete MSBM training for all datasets was accomplished in less than one hour using a single NVIDIA A6000 GPU. The remaining training hyper-parameters are detailed in Table C.1.

Additionally, the tables below present the complete results from experiments conducted three times, each using a different random seed.

<sup>3</sup><https://github.com/TianrongChen/DMSB>, under MIT license

<sup>4</sup><https://github.com/KrishnaswamyLab/TrajectoryNet>, Non-Commercial License Yale Copyright

<sup>5</sup><https://github.com/YunyiShen/SB-Iterative-Reference-Refinement>

<sup>6</sup><https://github.com/take-koshizuka/NLSB>, under MIT license

Table C.2: Full results over 3 different seeds. Performance on the 100-dim PCA of EB dataset. MMD and SWD are computed between test  $\rho_{t_i}^{\text{te}}$  and generated  $\hat{\rho}_{t_i}$  by simulating the dynamics from test  $\rho_{t_0}^{\text{te}}$ .

| Methods                   | MMD ↓               |                     |                     |                    | SWD ↓               |                      |                      |                      |
|---------------------------|---------------------|---------------------|---------------------|--------------------|---------------------|----------------------|----------------------|----------------------|
|                           | Full                | $t_1$               | $t_2$               | $t_3$              | Full                | $t_1$                | $t_2$                | $t_3$                |
| NLSB <sup>†</sup> [24]    | 0.66                | 0.38                | 0.37                | 0.37               | 0.54                | 0.55                 | 0.54                 | 0.55                 |
| MIOFlow <sup>†</sup> [20] | 0.23                | 0.23                | 0.90                | 0.23               | 0.35                | 0.49                 | 0.72                 | 0.50                 |
| DMSB <sup>†</sup> [9]     | <b>0.03</b>         | <b>0.04</b>         | <b>0.04</b>         | <b>0.04</b>        | <b>0.16</b>         | <b>0.20</b>          | <b>0.19</b>          | <b>0.18</b>          |
| <b>MSBM</b>               | <b>0.018 ± 4e-4</b> | <b>0.049 ± 3e-2</b> | <b>0.038 ± 5e-4</b> | <b>0.05 ± 9e-4</b> | <b>0.129 ± 3e-3</b> | <b>0.1895 ± 1e-2</b> | <b>0.1772 ± 2e-3</b> | <b>0.1997 ± 4e-3</b> |

<sup>†</sup> result from [9].

Table C.3: Full results over 3 different seeds. Performance on the 5-dim PCA of hESC dataset.  $\mathcal{W}_2$  is compute between test  $\rho_{t_i}$  and generated  $\hat{\rho}_{t_i}$  by simulating the dynamics from test  $\rho_{t_0}$ .

| Methods                    | $\mathcal{W}_2$ ↓   |                     | Runtime            |
|----------------------------|---------------------|---------------------|--------------------|
|                            | $t_1$               | $t_3$               | hours              |
| TrajectoryNet <sup>†</sup> | 1.30                | 1.93                | 10.19              |
| DMSB <sup>†</sup>          | 1.10                | 1.51                | 15.54              |
| SBIRR <sup>†</sup>         | <b>1.08</b>         | <b>1.33</b>         | 0.36 (0.38)*       |
| <b>MSBM (Ours)</b>         | <b>1.083 ± 7e-3</b> | <b>1.304 ± 3e-2</b> | <b>0.09 ± 1e-2</b> |

<sup>†</sup> result from [54].

Table C.4: Full results over 3 different seeds. Performance on the 5-dim PCA of EB dataset.  $\mathcal{W}_1$  is computed between test  $\rho_{t_i}^{\text{te}}$  and generated  $\hat{\rho}_{t_i}$  by simulating the dynamics from previous test  $\rho_{t_{i-1}}^{\text{te}}$ .

| Methods                         | $\mathcal{W}_1$ ↓  |                    |                    |                    |                    |
|---------------------------------|--------------------|--------------------|--------------------|--------------------|--------------------|
|                                 | $t_1$              | $t_2$              | $t_3$              | $t_4$              | Mean               |
| Neural SDE <sup>†</sup> [27]    | 0.69               | 0.91               | 0.85               | 0.81               | 0.82               |
| TrajectoryNet <sup>†</sup> [58] | 0.73               | 1.06               | 0.90               | 1.01               | 0.93               |
| IPF (GP) <sup>†</sup> [59]      | 0.70               | 1.04               | 0.94               | 0.98               | 0.92               |
| IPF (NN) <sup>†</sup> [5]       | 0.73               | 0.89               | 0.84               | 0.83               | 0.82               |
| SB-FBSDE <sup>†</sup> [10]      | <b>0.56</b>        | 0.80               | 1.00               | 1.00               | 0.84               |
| NLSB <sup>†</sup> [24]          | 0.68               | 0.84               | 0.81               | 0.79               | 0.78               |
| OT-CFM <sup>†</sup> [57]        | 0.78               | 0.76               | 0.77               | <b>0.75</b>        | 0.77               |
| WLF-SB <sup>‡</sup> [41]        | <b>0.63</b>        | <b>0.79</b>        | 0.77               | <b>0.75</b>        | <b>0.73</b>        |
| <b>MSBM (Ours)</b>              | <b>0.64 ± 7e-3</b> | <b>0.73 ± 8e-3</b> | <b>0.72 ± 1e-2</b> | <b>0.73 ± 9e-3</b> | <b>0.71 ± 7e-3</b> |

<sup>†</sup> result from [24], <sup>‡</sup> result from [41].
